# Supplementary material
Source: PubMed Central journal article supplement (PMC7165363)
Supplement: NIHMS1577474-supplement-Online_Resource_1.pdf [file NIHMS1577474-supplement-Online_Resource_1.pdf]

**Supplementary Table 1. Additional clinical variables and their correlations to gene richness.**

| Variable (units; n) | Summary statistics |        |       | Gene richness correlation |       |
|---------------------|--------------------|--------|-------|---------------------------|-------|
|                     | 1Q                 | Median | 3Q    | Rho                       | P     |
| Android fat (%; 49) | 53.79              | 58.91  | 63.11 | -0.1                      | 0.506 |
| NEFA (mM;49)        | 0.31               | 0.45   | 0.52  | 0.1                       | 0.493 |
| HOMA-IR (49)        | 0.8                | 1.06   | 1.4   | -0.2                      | 0.198 |
| Disse Index (49)    | -8.13              | -5.6   | -2.63 | 0.2                       | 0.188 |
| QUICKI (49)         | 0.33               | 0.35   | 0.37  | 0.22                      | 0.153 |
| OGTT-60 (mM;49)     | 5.75               | 7.05   | 8.18  | -0.06                     | 0.711 |
| OGTT-120 (mM; 40)   | 4.2                | 5.05   | 6.05  | 0.17                      | 0.307 |
| Matusuda (39)       | 4.49               | 5.71   | 8.79  | 0.13                      | 0.42  |
| ISSI-2 (39)         | 23.36              | 30.93  | 34.63 | 0.13                      | 0.454 |
| AST (U/L; 48)       | 19                 | 25     | 32.25 | 0.08                      | 0.626 |
| ALT (U/L; 48)       | 20.75              | 24     | 33.5  | -0.07                     | 0.647 |
| GGT (U/L; 48)       | 17.75              | 22.5   | 42.75 | 0.05                      | 0.756 |

Rho reflects Spearman correlations. OGTT-60 and OGTT-120 = plasma glucose during OGTT at 60 and 120 minutes, respectively, ISSI-2 = insulin-secretion-sensitivity-index-2.
