# Supplementary material
Source: PubMed Central journal article supplement (PMC7165363)
Supplement: NIHMS1577474-supplement-Online_Resource_2.pdf [file NIHMS1577474-supplement-Online_Resource_2.pdf]

**Supplementary Table 2.** Clinical variables following dietary intervention stratified by baseline gene count status.

|                        | HGC            |                 |                 | LGC             |                 |                 | ANOVA (P values) |               |               |
|------------------------|----------------|-----------------|-----------------|-----------------|-----------------|-----------------|------------------|---------------|---------------|
|                        | Week 0         | Week 6 (WL)     | Week 12 (WS)    | Week 0          | Week 6 (WL)     | Week 12 (WS)    | Genecount        | Time          | Interaction   |
| Weight (kg)            | 91.41 (2.78)   | 85.96 (2.66)    | 86.32 (2.77)    | 92.33 (3.19)    | 86.94 (3.26)    | 87.33 (3.57)    | 0.8223           | <b>0.0000</b> | 0.9938        |
| BMI                    | 32.96 (0.74)   | 31 (0.74)       | 31.12 (0.75)    | 33.5 (0.86)     | 31.52 (0.89)    | 31.63 (0.99)    | 0.6563           | <b>0.0000</b> | 0.9946        |
| Waist (cm)             | 106.52 (1.8)   | 99.81 (1.64)    | 99.27 (2.1)     | 106.92 (2.53)   | 102.44 (3.1)    | 101.33 (3.3)    | 0.5948           | <b>0.0000</b> | 0.4507        |
| Waist to hip           | 0.92 (0.01)    | 0.89 (0.01)     | 0.88 (0.02)     | 0.92 (0.02)     | 0.91 (0.02)     | 0.89 (0.02)     | 0.7427           | <b>0.0006</b> | 0.5912        |
| Fat mass (%)           | 38.92 (1.31)   | 37.44 (1.4)     | 36.84 (1.3)     | 39.88 (1.61)    | 38.68 (1.7)     | 38.33 (1.61)    | 0.5617           | <b>0.0000</b> | 0.4856        |
| Total cholesterol (mM) | 5.16 (0.13)    | 4.31 (0.14)     | 5 (0.15)        | 5.7 (0.23)      | 4.72 (0.28)     | 5.45 (0.31)     | <b>0.0776</b>    | <b>0.0000</b> | 0.7550        |
| HDL-C (mM)             | 1.44 (0.07)    | 1.22 (0.05)     | 1.53 (0.06)     | 1.34 (0.07)     | 1.11 (0.05)     | 1.43 (0.07)     | 0.2262           | <b>0.0000</b> | 0.9700        |
| LDL-C (mM)             | 3.21 (0.12)    | 2.67 (0.12)     | 3.06 (0.14)     | 3.62 (0.21)     | 3.04 (0.27)     | 3.5 (0.3)       | 0.1054           | <b>0.0000</b> | 0.9051        |
| Triglycerides (mM)     | 1.19 (0.16)    | 0.93 (0.1)      | 0.9 (0.09)      | 1.62 (0.19)     | 1.26 (0.14)     | 1.15 (0.11)     | <b>0.0514</b>    | <b>0.0001</b> | 0.5374        |
| NEFA (mM)              | 0.44 (0.03)    | 0.51 (0.03)     | 0.37 (0.03)     | 0.43 (0.03)     | 0.62 (0.06)     | 0.43 (0.05)     | 0.1376           | <b>0.0000</b> | 0.2393        |
| Glucose (mM)           | 5.15 (0.08)    | 4.95 (0.07)     | 5.06 (0.09)     | 5.24 (0.08)     | 5.05 (0.08)     | 4.9 (0.1)       | 0.9160           | <b>0.0025</b> | <b>0.0651</b> |
| Insulin (mU/L)         | 8.31 (0.87)    | 5.28 (0.37)     | 6.16 (0.77)     | 9.62 (0.99)     | 6.59 (0.62)     | 6.02 (0.61)     | 0.3592           | <b>0.0000</b> | 0.2556        |
| HOMA-IR                | 1.08 (0.11)    | 0.69 (0.05)     | 0.82 (0.1)      | 1.25 (0.13)     | 0.86 (0.08)     | 0.79 (0.07)     | 0.3717           | <b>0.0000</b> | 0.1820        |
| Disse Index            | -5.08 (0.96)   | -2.69 (0.7)     | -1.34 (0.99)    | -7.45 (1.26)    | -6.58 (1.1)     | -3.01 (1.02)    | <b>0.0270</b>    | <b>0.0000</b> | 0.3069        |
| QUICKI                 | 0.35 (0)       | 0.38 (0)        | 0.37 (0.01)     | 0.34 (0.01)     | 0.37 (0.01)     | 0.37 (0.01)     | 0.2445           | <b>0.0000</b> | 0.2601        |
| Adiponectin (µg/ml)    | 13.76 (1.14)   | 12.49 (1.15)    | 14.11 (1.33)    | 14.93 (1.58)    | 13 (1.65)       | 15.72 (1.68)    | 0.5565           | <b>0.0042</b> | 0.6875        |
| CRP (mg/L)             | 4.71 (1.27)    | 3.29 (0.86)     | 2.9 (0.61)      | 5.39 (1.08)     | 4.7 (0.82)      | 4.53 (0.87)     | 0.2581           | 0.1351        | 0.8122        |
| IL-6 (pg/ml)           | 2.04 (0.32)    | 2.16 (0.46)     | 1.92 (0.4)      | 2.44 (0.6)      | 1.71 (0.25)     | 1.59 (0.21)     | 0.7824           | 0.4498        | 0.3793        |
| MCP-1 (pg/ml)          | 39.2 (6.35)    | 28.37 (4.34)    | 31.7 (5.03)     | 35.93 (4.23)    | 29.7 (3.26)     | 29.5 (3.56)     | 0.8388           | <b>0.0001</b> | 0.5300        |
| sCD14 (pg/ml)          | 1359.76 (70.1) | 1460.38 (76.42) | 1426.84 (74.09) | 1514.91 (115.2) | 1294.53 (62.25) | 1523.51 (95.16) | 0.7339           | 0.5961        | <b>0.0656</b> |

NEFA = non-esterified fatty acids, MCP-1 = monocyte chemoattractant protein-1, sCD14 = soluble CD14. HGC = high gene count, LGC = low gene count.

WL = Weight loss period, WS = Weight stabilization period. ANOVA P calculated from random effect ANOVA (subject-specific intercept). Bold type indicates P<0.10
