# Supplementary material
Source: PubMed Central journal article supplement (PMC7165363)
Supplement: NIHMS1577474-supplement-Online_resource_3.pdf [file NIHMS1577474-supplement-Online_resource_3.pdf]

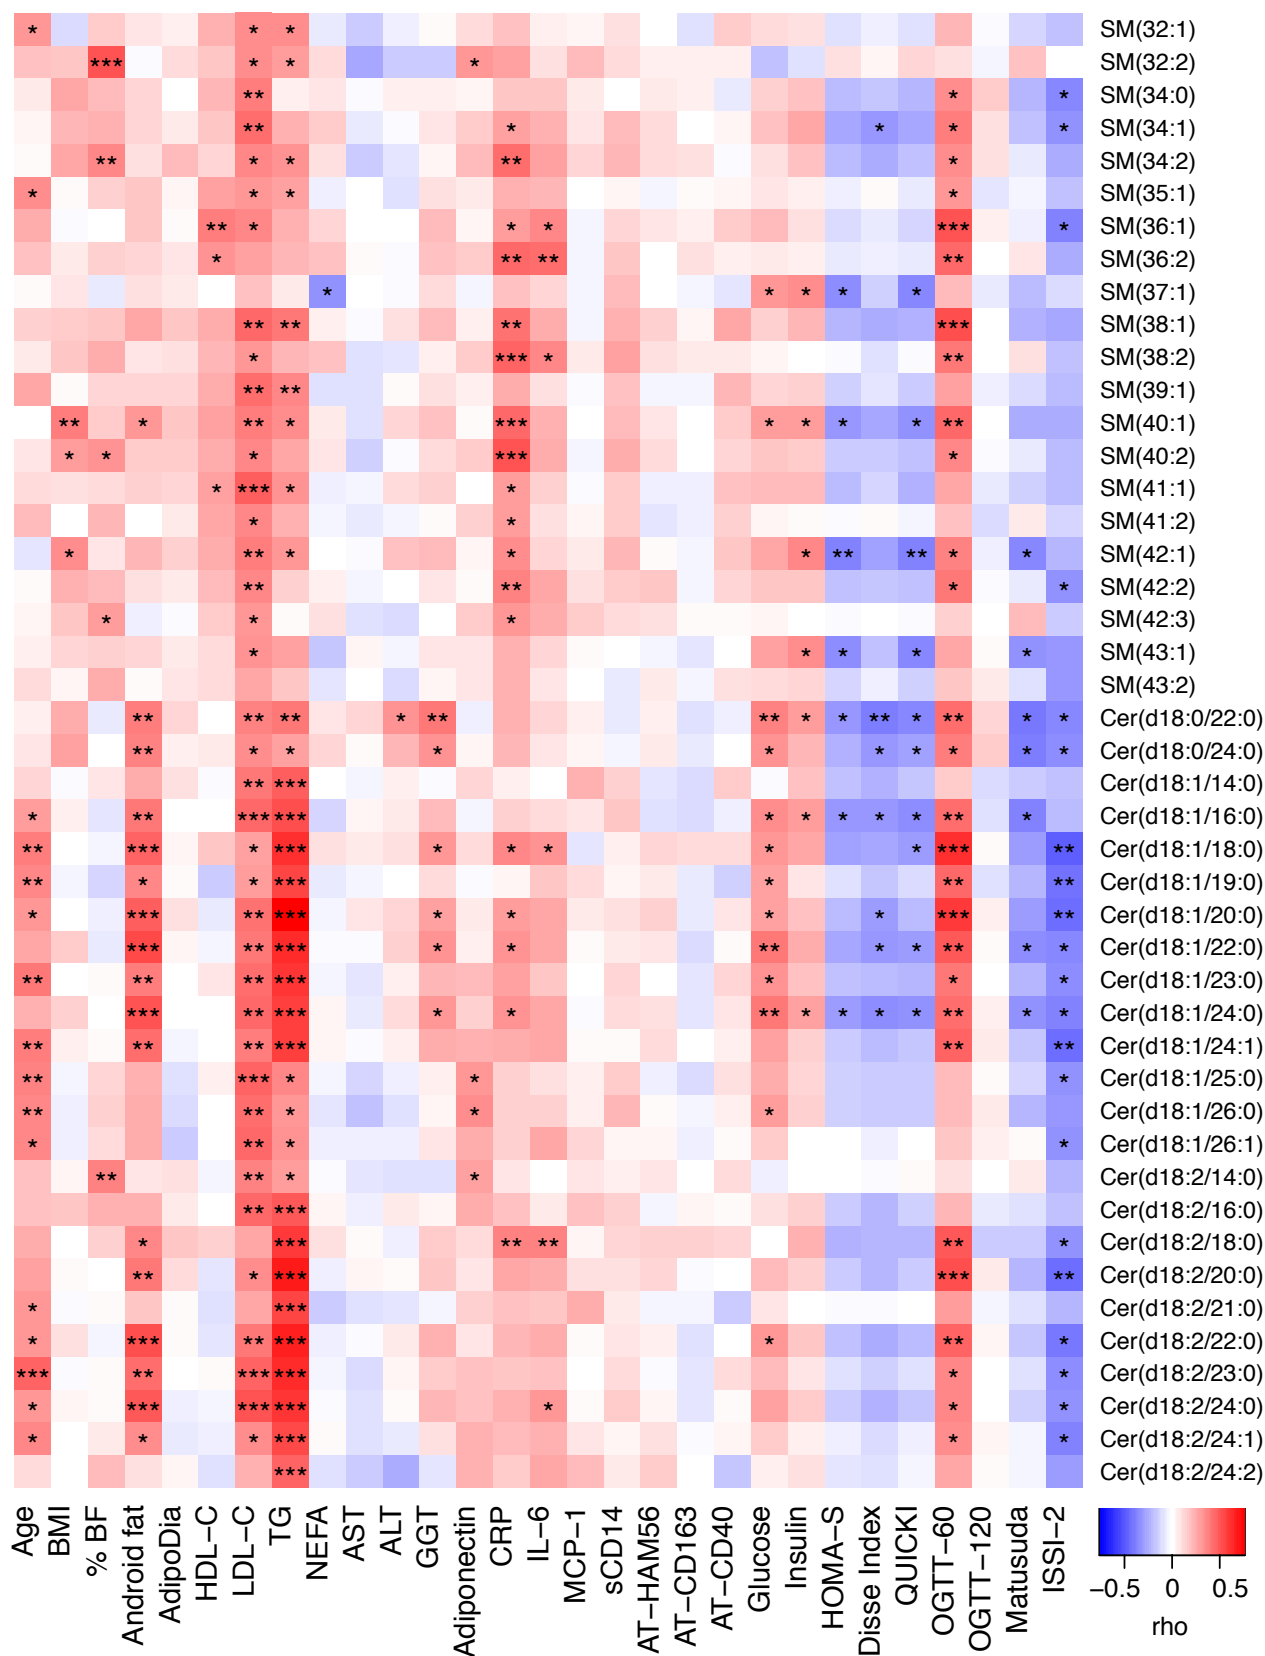

**Supplementary Figure 1.** Spearman correlations between sphingolipids and clinical variables. \* $P < 0.05$ , \*\* $P < 0.01$ , \*\*\* $P < 0.001$ . % BF = Percent body fat, AdipoDia = adipocyte diameter, TG = fasting triglycerides, NEFA = non-esterified free fatty acids, sCD14 = soluble CD14, OGTT-60 and OGTT-120 = plasma glucose during OGTT at 60 and 120 minutes, respectively, ISSI-2 = insulin-secretion-sensitivity-index-2. DHCer are labeled by their chemical structure Cer(d18:0).
