# Supplementary material
Source: PubMed Central journal article supplement (PMC7165363)
Supplement: NIHMS1577474-supplement-Online_resource_4.pdf [file NIHMS1577474-supplement-Online_resource_4.pdf]

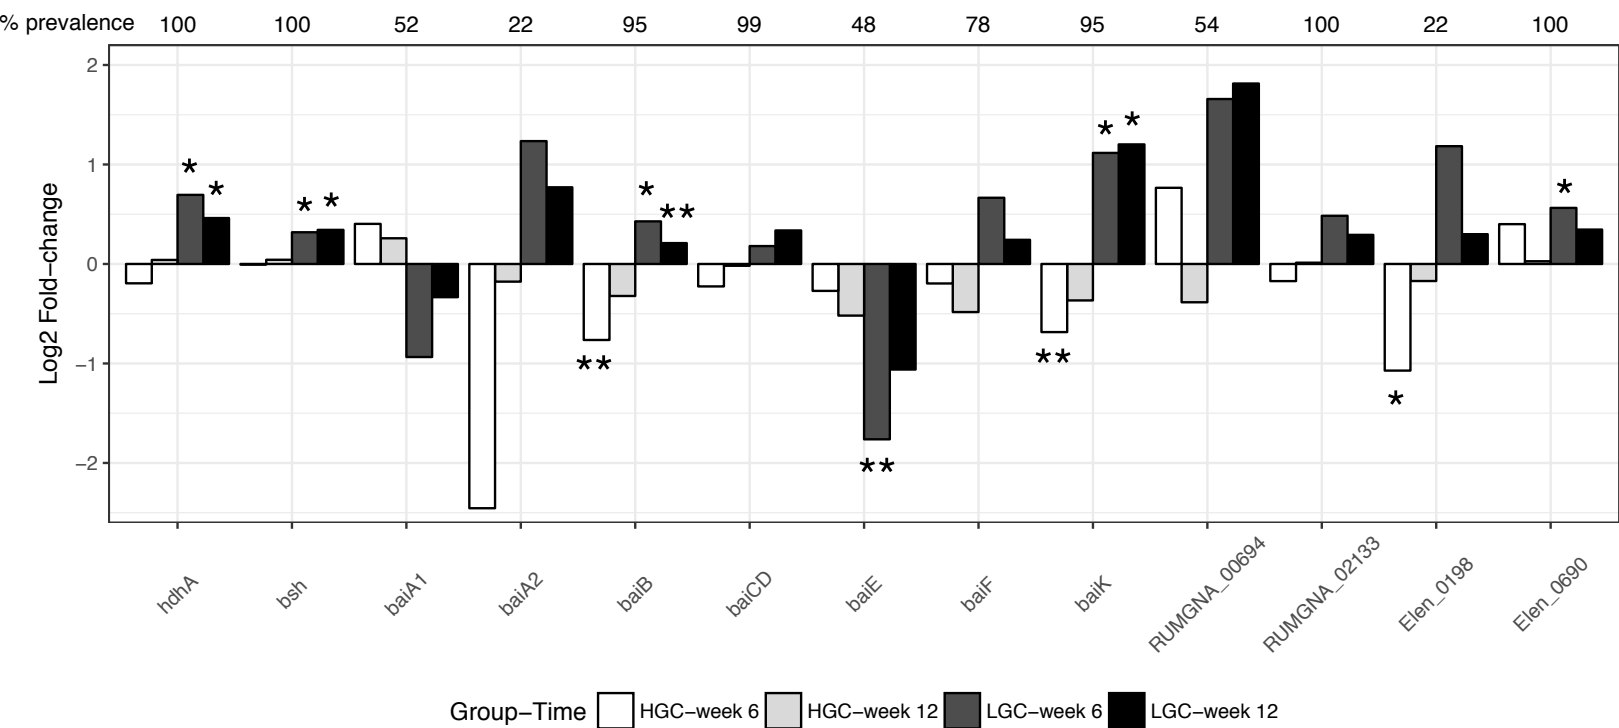

**Supplementary Figure 2.** Fold change (on log base 2 scale) of each bile acid gene between baseline and weeks 6 and 12, stratified by baseline gene richness. Prevalence is number of metagenome samples (subject 1 at baseline is a different sample from subject 1 at week 6) with abundance greater than 0. Statistical significance was determined by paired Wilcoxon tests with \* $P < 0.05$  and \*\* $P < 0.01$ . Fold-change of means was calculated because too many zeros were present in some genes to calculate fold-change with median (resulted in infinity or undefined ratios).
